# Supplementary material
Source: publisher site journal article supplement (https://www.degruyterbrill.com/publication/journal_key/JTPH/downloadAsset/JTPH_CFP%20Kantian%20Metphysical%20Legacies.pdf)
Supplement: Supplementary file 1 [file JTPH_CFP%20Kantian%20Metphysical%20Legacies.pdf]

***Journal of Transcendental Philosophy***

**Call for Papers for the Special Issue 2025 (volume 6/3):**

***Kantian Metaphysical Legacies***

**guest edited by**

**Faustino Fabbianelli (University of Parma) and Antonino Falduto (University of Ferrara)**

**<https://www.degruyter.com/journal/key/jtph/html>**

The special issue aims to make a contribution to the debate surrounding the metaphysical legacies of Kant's philosophy from the eighteenth century onwards. Metaphysical questions, proposals and solutions will be analyzed either from a theoretical perspective or against a practical background. In this way, not only Kant's heritage, but also the potential of Kant's philosophy for contemporary thought will be examined and underlined.

Essays of both systematic and historical-philosophical nature will converge around the following thematic nucleuses:

- 1) The metaphysical dimension of transcendental idealism and the still controversially debated meaning of it. Both the argument that things in themselves cannot be spatiotemporal and the defense of the theorization concerning absolute freedom, which have already been the object of contemporary criticism at Kant's time, will be put under proof and newly assessed. In particular, in this last regard, it will be questioned to what extent the argument that we must believe in the fully actual realization of regulative ideals in afterlife can be considered as failing today.
- 2) The metaphysical dimension of feelings, their essential but limited function in the context of transcendental philosophy in general, and in moral philosophy in particular, will be taken into account. Both the spheres of juridical and ethical laws will be considered. In the context of the two mentioned, juridical and ethical domains, the non-empirical, "metaphysical" standards of the universality and necessity of reason will be questioned, due to the role played by feelings in them.
- 3) The metaphysical dimensions of Kant's work in general will be considered also from a theoretical-historical and meta-ethical perspective. As to the former one, a historical-systematic reconstruction of the central moments which unite Kant's metaphysics with exemplary moments of contemporary metaphysics will be analyzed. As to the latter one, it will be discussed to what extent constitutivism can be characterized as Kant's approach to moral philosophy and meta-normative theory.

*Submissions*

Papers should be submitted by June 30<sup>th</sup>, 2025, using the journal's submission site:

<https://mc.manuscriptcentral.com/jtph>.

Upon submitting your manuscript, please specify in your cover letter that the manuscript is meant for this special issue, so that it can be assigned to the appropriate guest editors. Papers must be prepared for blind review, removing all self-identifying references. The formatting of the submission is up to the author; accepted papers will be asked to adhere to journal style (see the journal's website for further information: <https://www.degruyter.com/view/journals/jtph/jtphoverview.xml>).
